# Supplementary material for: Quantitative measurement of benthic foraminifera sediment reworking using a three-dimensional sensor
Source: Copernicus journal article supplement (doi:10.5194/jm-44-401-2025), 2025-10-29
Supplement: Supplementary file 1 [file Data 3DCamera_SurfaceImageAnalysis.xlsx]

## Sheet: Data set 3D Camera
Time	Treatment	Replicate	Treatment_Replicate	Surface Positive (Sel i(t))	Surace Negative (Sdep i(t))	Volume Positive (Vel i(t))	Volume Negative (Vdep i(t))
hour				mm2/15ind/h (except time 24: mm2/15ind/14h)	mm2/15ind/h (except time 24: mm2/15ind/14h)	mm3/15ind/h (except time 24: mm3/15ind/14h)	mm3/15ind/h (except time 24: mm3/15ind/14h)
0	Control	1	Control_1	0	0	0	0
1	Control	1	Control_1	0.38	0.19	0.11871	0.039691
2	Control	1	Control_1	0.03	0.42	0.0059471	0.14294
3	Control	1	Control_1	0.01	0	0.017065	0
4	Control	1	Control_1	0	0.06	0	0.025687
5	Control	1	Control_1	0.05	0	0.008761	0
6	Control	1	Control_1	0.01	0.04	0.017857	0.0073439
7	Control	1	Control_1	0.29	0.1	0.06349	0.078937
8	Control	1	Control_1	0.8	0.29	0.20599	0.062093
9	Control	1	Control_1	0.01	0.75	0.0015559	0.16648
10	Control	1	Control_1	0.3	0.02	0.069447	0.018866
24	Control	1	Control_1	0.4	0.37	0.087242	0.096887
25	Control	1	Control_1	0.08	0.16	0.02299	0.058235
26	Control	1	Control_1	0.09	0.09	0.088343	0.033088
27	Control	1	Control_1	0.07	0.07	0.043231	0.022138
28	Control	1	Control_1	0.36	0.12	0.069069	0.052234
29	Control	1	Control_1	0.03	0.38	0.013269	0.10037
30	Control	1	Control_1	0.06	0.02	0.03484	0.033253
31	Control	1	Control_1	0.02	0.08	0.036824	0.029471
32	Control	1	Control_1	0.04	0.01	0.024428	0.0032697
33	Control	1	Control_1	0.07	0	0.044878	0
34	Control	1	Control_1	0.55	0.13	0.12224	0.11966
0	Control	2	Control_2	0	0	0	0
1	Control	2	Control_2	0.33	0.19	0.064775	0.034752
2	Control	2	Control_2	0.27	0.24	0.048978	0.19856
3	Control	2	Control_2	0.2	0	0.12612	0
4	Control	2	Control_2	0.09	0.04	0.081241	0.0068703
5	Control	2	Control_2	0.07	0.16	0.012111	0.033373
6	Control	2	Control_2	0.13	0.13	0.029418	0.023862
7	Control	2	Control_2	0.18	0.27	0.031777	0.058355
8	Control	2	Control_2	0.38	0.42	0.079739	0.11887
9	Control	2	Control_2	0.13	0.08	0.065115	0.01565
10	Control	2	Control_2	0.04	0.05	0.0071752	0.009976
24	Control	2	Control_2	0.38	0.17	0.077138	0.033342
25	Control	2	Control_2	0.15	0.38	0.024724	0.064216
26	Control	2	Control_2	0.77	0.63	0.13769	0.11799
27	Control	2	Control_2	0.84	0	0.17033	0
28	Control	2	Control_2	0.42	0.9	0.081984	0.17405
29	Control	2	Control_2	0.03	0.33	0.0063745	0.064191
30	Control	2	Control_2	0.07	0.05	0.013045	0.060738
31	Control	2	Control_2	0.02	0.1	0.055213	0.019728
32	Control	2	Control_2	0.2	0.01	0.036307	0.0019406
33	Control	2	Control_2	0.17	0.19	0.03149	0.03351
34	Control	2	Control_2	0	0.18	0	0.033677
0	Control	3	Control_3	0	0	0	0
1	Control	3	Control_3	0	0	0	0
2	Control	3	Control_3	0.11	0	0.019362	0
3	Control	3	Control_3	0	0.13	0	0.022988
4	Control	3	Control_3	0	0	0	0
5	Control	3	Control_3	0	0	0	0
6	Control	3	Control_3	0	0	0	0
7	Control	3	Control_3	0	0	0	0
8	Control	3	Control_3	0	0	0	0
9	Control	3	Control_3	0	0	0	0
10	Control	3	Control_3	0	0	0	0
24	Control	3	Control_3	0.02	0	0.0034111	0
25	Control	3	Control_3	0	0.01	0	0.0016595
26	Control	3	Control_3	0.09	0	0.058254	0
27	Control	3	Control_3	0.06	0.15	0.0096261	0.070186
28	Control	3	Control_3	0.03	0	0.0052882	0
29	Control	3	Control_3	0	0	0	0
30	Control	3	Control_3	0	0	0	0
31	Control	3	Control_3	0.04	0	0.0064606	0
32	Control	3	Control_3	0.01	0	0.0016426	0
33	Control	3	Control_3	0.12	0.15	0.019985	0.026709
34	Control	3	Control_3	0.22	0.03	0.036197	0.0049804
0	Ammonia confertitesta	1	Ammonia confertitesta_1	0	0	0	0
1	Ammonia confertitesta	1	Ammonia confertitesta_1	6.96	0.78	1.809	0.15562
2	Ammonia confertitesta	1	Ammonia confertitesta_1	8.54	3.85	2.414	0.92586
3	Ammonia confertitesta	1	Ammonia confertitesta_1	9.3	3.54	2.6702	0.95675
4	Ammonia confertitesta	1	Ammonia confertitesta_1	9.54	4.47	2.6246	1.0234
5	Ammonia confertitesta	1	Ammonia confertitesta_1	10.49	4.13	2.8683	1.1163
6	Ammonia confertitesta	1	Ammonia confertitesta_1	9.82	3.88	2.467	1.1072
7	Ammonia confertitesta	1	Ammonia confertitesta_1	8.22	2.46	2.3156	0.54589
8	Ammonia confertitesta	1	Ammonia confertitesta_1	9.4	2.92	2.5288	0.72421
9	Ammonia confertitesta	1	Ammonia confertitesta_1	8.77	3.11	2.2255	0.72134
10	Ammonia confertitesta	1	Ammonia confertitesta_1	9.6	3.58	2.5308	0.79978
24	Ammonia confertitesta	1	Ammonia confertitesta_1	101.05	9.13	24.921	1.813
25	Ammonia confertitesta	1	Ammonia confertitesta_1	10.03	1.71	2.4889	0.36754
26	Ammonia confertitesta	1	Ammonia confertitesta_1	6.55	3.14	1.5504	0.78609
27	Ammonia confertitesta	1	Ammonia confertitesta_1	5.35	0.71	1.2785	0.12878
28	Ammonia confertitesta	1	Ammonia confertitesta_1	6.37	0.29	1.5375	0.059347
29	Ammonia confertitesta	1	Ammonia confertitesta_1	7.77	1.2	1.7451	0.22351
30	Ammonia confertitesta	1	Ammonia confertitesta_1	5.35	1.11	1.2675	0.22483
31	Ammonia confertitesta	1	Ammonia confertitesta_1	5.39	1.95	1.2853	0.54807
32	Ammonia confertitesta	1	Ammonia confertitesta_1	5.06	1.4	1.2808	0.2961
33	Ammonia confertitesta	1	Ammonia confertitesta_1	9.15	2.53	2.1671	0.62346
34	Ammonia confertitesta	1	Ammonia confertitesta_1	7.58	1.74	1.9341	0.37883
0	Ammonia confertitesta	2	Ammonia confertitesta_2	0	0	0	0
1	Ammonia confertitesta	2	Ammonia confertitesta_2	4.04	0.85	1.1636	0.16315
2	Ammonia confertitesta	2	Ammonia confertitesta_2	9.06	5.21	2.9963	1.4582
3	Ammonia confertitesta	2	Ammonia confertitesta_2	10.06	7.32	3.0432	2.2173
4	Ammonia confertitesta	2	Ammonia confertitesta_2	10.42	6.73	3.3652	2.0359
5	Ammonia confertitesta	2	Ammonia confertitesta_2	9.79	7.35	3.1218	2.2892
6	Ammonia confertitesta	2	Ammonia confertitesta_2	9.61	6	3.1271	1.6303
7	Ammonia confertitesta	2	Ammonia confertitesta_2	10.95	7.09	3.6205	2.1155
8	Ammonia confertitesta	2	Ammonia confertitesta_2	12.42	9.02	4.2721	2.9526
9	Ammonia confertitesta	2	Ammonia confertitesta_2	10.68	7.72	3.4064	2.5024
10	Ammonia confertitesta	2	Ammonia confertitesta_2	11.11	7.69	3.3177	2.1882
24	Ammonia confertitesta	2	Ammonia confertitesta_2	71.49	7.51	17.827	2.0238
25	Ammonia confertitesta	2	Ammonia confertitesta_2	9.53	5.5	2.7192	1.9054
26	Ammonia confertitesta	2	Ammonia confertitesta_2	7.05	5.67	2.1192	1.382
27	Ammonia confertitesta	2	Ammonia confertitesta_2	6.73	2.21	1.7093	0.49851
28	Ammonia confertitesta	2	Ammonia confertitesta_2	6.69	4.35	2.0907	1.2704
29	Ammonia confertitesta	2	Ammonia confertitesta_2	6.8	4.37	2.0307	1.093
30	Ammonia confertitesta	2	Ammonia confertitesta_2	7.56	3.77	2.0758	1.0391
31	Ammonia confertitesta	2	Ammonia confertitesta_2	7.34	2.45	1.9629	0.58605
32	Ammonia confertitesta	2	Ammonia confertitesta_2	4.84	1.8	1.3867	0.41143
33	Ammonia confertitesta	2	Ammonia confertitesta_2	2.44	1.26	0.61392	0.25134
34	Ammonia confertitesta	2	Ammonia confertitesta_2	5.69	2.21	2.1928	0.60799
0	Ammonia confertitesta	3	Ammonia confertitesta_3	0	0	0	0
1	Ammonia confertitesta	3	Ammonia confertitesta_3	5.05	0.04	1.0253	0.0063731
2	Ammonia confertitesta	3	Ammonia confertitesta_3	7.15	4.11	2.0945	1.19
3	Ammonia confertitesta	3	Ammonia confertitesta_3	8.49	5.17	2.5285	1.5976
4	Ammonia confertitesta	3	Ammonia confertitesta_3	10.3	6.1	2.7617	1.6461
5	Ammonia confertitesta	3	Ammonia confertitesta_3	8.97	5.17	2.6669	1.3249
6	Ammonia confertitesta	3	Ammonia confertitesta_3	11.05	6.87	3.5654	1.9132
7	Ammonia confertitesta	3	Ammonia confertitesta_3	13.79	9.37	4.401	2.5157
8	Ammonia confertitesta	3	Ammonia confertitesta_3	10.47	7.69	3.37	2.142
9	Ammonia confertitesta	3	Ammonia confertitesta_3	9.72	5.97	3.0265	1.4305
10	Ammonia confertitesta	3	Ammonia confertitesta_3	9.83	6.04	3.3042	1.5226
24	Ammonia confertitesta	3	Ammonia confertitesta_3	116.86	17.52	30.961	4.2042
25	Ammonia confertitesta	3	Ammonia confertitesta_3	10.17	7.11	3.0925	1.8871
26	Ammonia confertitesta	3	Ammonia confertitesta_3	7.83	3.05	2.7003	1.1251
27	Ammonia confertitesta	3	Ammonia confertitesta_3	7.24	5.6	2.2905	1.5298
28	Ammonia confertitesta	3	Ammonia confertitesta_3	7.21	3.86	2.1435	1.1855
29	Ammonia confertitesta	3	Ammonia confertitesta_3	9.36	3.81	2.4497	1.0094
30	Ammonia confertitesta	3	Ammonia confertitesta_3	8.48	2.73	2.5609	0.69254
31	Ammonia confertitesta	3	Ammonia confertitesta_3	9.6	0.48	2.0346	0.088985
32	Ammonia confertitesta	3	Ammonia confertitesta_3	3.83	1.24	0.92587	0.23163
33	Ammonia confertitesta	3	Ammonia confertitesta_3	4.15	0.18	1.9466	0.03328
34	Ammonia confertitesta	3	Ammonia confertitesta_3	7.49	2.61	1.8315	1.391

## Sheet: Data set Surface Image Analysis
Species	Time	Replicate	Individu	Volume of sediment reworked between two successive acquisitions (SSRRv i(t))
	hour			mm3/ind/h
Ammonia confertitesta	25	1	1	0.0470635
Ammonia confertitesta	26	1	1	0.157681
Ammonia confertitesta	27	1	1	0.114607
Ammonia confertitesta	28	1	1	0.0726819
Ammonia confertitesta	29	1	1	0.109872
Ammonia confertitesta	30	1	1	0.0821931
Ammonia confertitesta	31	1	1	0.136568
Ammonia confertitesta	32	1	1	0.0707517
Ammonia confertitesta	33	1	1	0.10072
Ammonia confertitesta	34	1	1	0.104021
Ammonia confertitesta	25	1	2	0.107322
Ammonia confertitesta	26	1	2	0.0611839
Ammonia confertitesta	27	1	2	0.0920455
Ammonia confertitesta	28	1	2	0.124919
Ammonia confertitesta	29	1	2	0.0793827
Ammonia confertitesta	30	1	2	0.0934199
Ammonia confertitesta	31	1	2	0.152687
Ammonia confertitesta	32	1	2	0.153662
Ammonia confertitesta	33	1	2	0.0969109
Ammonia confertitesta	34	1	2	0.154166
Ammonia confertitesta	25	1	3	0.116667
Ammonia confertitesta	26	1	3	0.0698865
Ammonia confertitesta	27	1	3	0.0548858
Ammonia confertitesta	28	1	3	0.100335
Ammonia confertitesta	29	1	3	0.0678764
Ammonia confertitesta	30	1	3	0.0506893
Ammonia confertitesta	31	1	3	0.156659
Ammonia confertitesta	32	1	3	0.110777
Ammonia confertitesta	33	1	3	0.168513
Ammonia confertitesta	34	1	3	0.0470635
Ammonia confertitesta	25	1	4	0.0156978
Ammonia confertitesta	26	1	4	0.0812447
Ammonia confertitesta	27	1	4	0.0653838
Ammonia confertitesta	28	1	4	0.086398
Ammonia confertitesta	29	1	4	0.0639278
Ammonia confertitesta	30	1	4	0.105672
Ammonia confertitesta	31	1	4	0.0484546
Ammonia confertitesta	32	1	4	0.0518241
Ammonia confertitesta	33	1	4	0.0492766
Ammonia confertitesta	34	1	4	0.12385
Ammonia confertitesta	25	2	5	0.0892392
Ammonia confertitesta	26	2	5	0.0526939
Ammonia confertitesta	27	2	5	0.071904
Ammonia confertitesta	28	2	5	0.0757784
Ammonia confertitesta	29	2	5	0.0400366
Ammonia confertitesta	30	2	5	0.06959
Ammonia confertitesta	31	2	5	0.044045
Ammonia confertitesta	32	2	5	0.0285878
Ammonia confertitesta	33	2	5	0.0265182
Ammonia confertitesta	34	2	5	0.0363211
Ammonia confertitesta	25	2	6	0.066653
Ammonia confertitesta	26	2	6	0.0659943
Ammonia confertitesta	27	2	6	0.0966999
Ammonia confertitesta	28	2	6	0.0925997
Ammonia confertitesta	29	2	6	0.081752
Ammonia confertitesta	30	2	6	0.106532
Ammonia confertitesta	31	2	6	0.0947238
Ammonia confertitesta	32	2	6	0.0934858
Ammonia confertitesta	33	2	6	0.0629857
Ammonia confertitesta	34	2	6	0.121624
Ammonia confertitesta	25	2	7	0.124657
Ammonia confertitesta	26	2	7	0.0921403
Ammonia confertitesta	27	2	7	0.0706956
Ammonia confertitesta	28	2	7	0.0609115
Ammonia confertitesta	29	2	7	0.0892532
Ammonia confertitesta	30	2	7	0.0982167
Ammonia confertitesta	31	2	7	0.0898621
Ammonia confertitesta	32	2	7	0.0626774
Ammonia confertitesta	33	2	7	0.0738661
Ammonia confertitesta	34	2	7	0.0731233
Ammonia confertitesta	25	2	8	0.077331
Ammonia confertitesta	26	2	8	0.134753
Ammonia confertitesta	27	2	8	0.104984
Ammonia confertitesta	28	2	8	0.143308
Ammonia confertitesta	29	2	8	0.144898
Ammonia confertitesta	30	2	8	0.0897406
Ammonia confertitesta	31	2	8	0.119654
Ammonia confertitesta	32	2	8	0.0725254
Ammonia confertitesta	33	2	8	0.0516007
Ammonia confertitesta	34	2	8	0.050316
Ammonia confertitesta	25	2	9	0.0810824
Ammonia confertitesta	26	2	9	0.0735848
Ammonia confertitesta	27	2	9	0.0270721
Ammonia confertitesta	28	2	9	0.0269922
Ammonia confertitesta	29	2	9	0.0501764
Ammonia confertitesta	30	2	9	0.0532202
Ammonia confertitesta	31	2	9	0.031694
Ammonia confertitesta	32	2	9	0.0546197
Ammonia confertitesta	33	2	9	0.0324332
Ammonia confertitesta	34	2	9	0.0417849
Ammonia confertitesta	25	2	10	0.0266101
Ammonia confertitesta	26	2	10	0.0908027
Ammonia confertitesta	27	2	10	0.0965987
Ammonia confertitesta	28	2	10	0.0432679
Ammonia confertitesta	29	2	10	0.0626774
Ammonia confertitesta	30	2	10	0.0406082
Ammonia confertitesta	31	2	10	0.0622896
Ammonia confertitesta	32	2	10	0.0471299
Ammonia confertitesta	33	2	10	0.0267923
Ammonia confertitesta	34	2	10	0.0815137
Ammonia confertitesta	25	2	11	0.0654041
Ammonia confertitesta	26	2	11	0.0822254
Ammonia confertitesta	27	2	11	0.0966999
Ammonia confertitesta	28	2	11	0.0885852
Ammonia confertitesta	29	2	11	0.0891847
Ammonia confertitesta	30	2	11	0.118923
Ammonia confertitesta	31	2	11	0.053038
Ammonia confertitesta	32	2	11	0
Ammonia confertitesta	33	2	11	0
Ammonia confertitesta	34	2	11	0
Ammonia confertitesta	25	3	12	0.0824602
Ammonia confertitesta	26	3	12	0.0454182
Ammonia confertitesta	27	3	12	0.0991006
Ammonia confertitesta	28	3	12	0.0555435
Ammonia confertitesta	29	3	12	0.0769059
Ammonia confertitesta	30	3	12	0.0851294
Ammonia confertitesta	31	3	12	0.0730086
Ammonia confertitesta	32	3	12	0.0363789
Ammonia confertitesta	33	3	12	0.0740645
Ammonia confertitesta	34	3	12	0.0365043
Ammonia confertitesta	25	3	13	0.156691
Ammonia confertitesta	26	3	13	0.167993
Ammonia confertitesta	27	3	13	0.109472
Ammonia confertitesta	28	3	13	0.0926747
Ammonia confertitesta	29	3	13	0.114842
Ammonia confertitesta	30	3	13	0.0793017
Ammonia confertitesta	31	3	13	0.118442
Ammonia confertitesta	32	3	13	0.094865
Ammonia confertitesta	33	3	13	0.0521523
Ammonia confertitesta	34	3	13	0.0217854
Ammonia confertitesta	25	3	14	0.0573214
Ammonia confertitesta	26	3	14	0.0684936
Ammonia confertitesta	27	3	14	0.10574
Ammonia confertitesta	28	3	14	0.0773787
Ammonia confertitesta	29	3	14	0.061619
Ammonia confertitesta	30	3	14	0.109138
Ammonia confertitesta	31	3	14	0.0871944
Ammonia confertitesta	32	3	14	0.0986384
Ammonia confertitesta	33	3	14	0.094865
Ammonia confertitesta	34	3	14	0.120315
Ammonia confertitesta	25	3	15	0.139498
Ammonia confertitesta	26	3	15	0.127032
Ammonia confertitesta	27	3	15	0.10893
Ammonia confertitesta	28	3	15	0.0841596
Ammonia confertitesta	29	3	15	0.134159
Ammonia confertitesta	30	3	15	0.0604226
Ammonia confertitesta	31	3	15	0.0871415
Ammonia confertitesta	32	3	15	0.120845
Ammonia confertitesta	33	3	15	0.0427248
Ammonia confertitesta	34	3	15	0.115437

## Sheet: Data set Methods Comparison 
Methods	Replicate	Individu	Total volume of sediment reworked (SSRRv i)
			mm3/ind/day
3D Camera	1		3.22748
3D Camera	2		4.47143
3D Camera	3		4.98405
Surface Image Analysis	1	1	2.39078
Surface Image Analysis	1	2	2.67768
Surface Image Analysis	1	3	2.26405
Surface Image Analysis	1	4	1.66015
Surface Image Analysis	2	5	1.28331
Surface Image Analysis	2	6	2.11932
Surface Image Analysis	2	7	2.00497
Surface Image Analysis	2	8	2.37387
Surface Image Analysis	2	9	1.13438
Surface Image Analysis	2	10	1.3879
Surface Image Analysis	2	11	1.42575
Surface Image Analysis	3	12	1.59483
Surface Image Analysis	3	13	2.41973
Surface Image Analysis	3	14	2.11369
Surface Image Analysis	3	15	2.44884
