# Supplementary material for: Quantitative measurement of benthic foraminifera sediment reworking using a three-dimensional sensor
Source: Copernicus journal article supplement (doi:10.5194/jm-44-401-2025), 2025-10-29
Supplement: Supplementary file [file jm-44-401-2025-supplement-title-page.pdf › jm-44-401-2025-supplement-title-page.pdf]

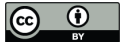

*Supplement of*

## **Quantitative measurement of benthic foraminifera sediment reworking using a three-dimensional sensor**

**Manon Doutrelant et al.**

*Correspondence to:* Manon Doutrelant ([manon.doutrelant@free.fr](mailto:manon.doutrelant@free.fr)) and Vincent M. P. Bouchet ([vincent.bouchet@univ-lille.fr](mailto:vincent.bouchet@univ-lille.fr))

- [jm-44-401-2025-supplement-title-page.pdf](#)
- [Data 3DCamera\\_SurfaceImageAnalysis.xlsx](#)

The copyright of individual parts of the supplement might differ from the article licence.
